# Supplementary material
Source: publisher figshare collection journal article supplement (https://gsajournals.figshare.com/ndownloader/files/23392562)
Supplement: Supplementary file 1 [file 23392562]

**Table S1. Strains used in this study.**

| Strains | Genotype | References |
| --- | --- | --- |
| H99 | *MATα* | ([Perfect *et al.* 1993](#_ENREF_3)) |
| *cir1Δ* | *MATα cir1::NAT* | ([Jung *et al.* 2006](#_ENREF_2)) |
| *hapXΔ* | *MATα hapX::NAT* | ([Jung *et al.* 2010](#_ENREF_1)) |
| Cir1-FLAG | *MATα CIR1-FLAG-NEO* | This study |
| HapX-FLAG | *MATα hapX::NAT, HAPX-FLAG-NEO* | This study |
| P*CCP1Δ* (11 bpΔ) | *MATα NEO- PCCP1Δ (11bp deletion)-CCP1* | This study |
| P*CCP1Δ* (GCTTA) | *MATα NEO- PCCP1Δ (GCTTA)-CCP1* | This study |
| P*CCP1Δ* (GGTAA) | *MATα NEO- PCCP1Δ (GGTAA)-CCP1* | This study |

**References**

Jung, W. H., S. Saikia, G. Hu, J. Wang, C. K. Fung *et al.*, 2010 HapX positively and negatively regulates the transcriptional response to iron deprivation in *Cryptococcus neoformans.* PLoS Pathog 6**:** e1001209.

Jung, W. H., A. Sham, R. White and J. W. Kronstad, 2006 Iron regulation of the major virulence factors in the AIDS-associated pathogen *Cryptococcus neoformans*. PLoS Biol 4**:** e410.

Perfect, J., N. Ketabchi, G. Cox, C. Ingram and C. Beiser, 1993 Karyotyping of *Cryptococcus neoformans* as an epidemiological tool. Journal of clinical microbiology 31**:** 3305-3309.
